# Supplementary material for: Secondary Serpentine Forests of Poland as a Refuge for Vascular Flora
Source: MDPI journal article supplement (doi:10.3390/d13050201), 2021-05-12
Supplement: s1 [file s1]

**Table S1.** Summarized synoptic table derived from 95 relevés of serpentine forest communities from Poland. The positive  $\Phi$  coefficient values (multiplied by 100) and percentage frequency as superscripts are presented. Species diagnostic for one cluster ( $\Phi \geq 30$ , constancy  $\geq 20$  and constancy ratio  $>1.5$ ) are shaded in grey.

| Group No.                                                          | Asp – Pin          | Gal – Q            | Mol – Pin         | Til – Car         |
|--------------------------------------------------------------------|--------------------|--------------------|-------------------|-------------------|
| No. of relevés                                                     | 18                 | 37                 | 12                | 28                |
| <b>Ass. <i>Asplenio cuneifolii</i> - <i>Pinetum sylvestris</i></b> |                    |                    |                   |                   |
| <i>Viscaria vulgaris</i>                                           | 77.6 <sup>89</sup> | --- <sup>24</sup>  | --- <sup>.</sup>  | --- <sup>.</sup>  |
| <i>Pimpinella saxifraga</i>                                        | 73.6 <sup>78</sup> | --- <sup>.</sup>   | --- <sup>17</sup> | --- <sup>.</sup>  |
| <i>Thymus pulegioides</i>                                          | 69.6 <sup>56</sup> | --- <sup>.</sup>   | --- <sup>.</sup>  | --- <sup>.</sup>  |
| <i>Achillea millefolium</i>                                        | 68.1 <sup>94</sup> | 7.0 <sup>43</sup>  | --- <sup>8</sup>  | --- <sup>4</sup>  |
| <i>Robinia pseudoacacia</i>                                        | 65.5 <sup>50</sup> | --- <sup>.</sup>   | --- <sup>.</sup>  | --- <sup>.</sup>  |
| <i>Potentilla arenaria</i>                                         | 61.2 <sup>44</sup> | --- <sup>.</sup>   | --- <sup>.</sup>  | --- <sup>.</sup>  |
| <i>Asplenium cuneifolium</i>                                       | 58.1 <sup>50</sup> | --- <sup>8</sup>   | --- <sup>.</sup>  | --- <sup>.</sup>  |
| <i>Hieracium pilosella</i>                                         | 56.8 <sup>39</sup> | --- <sup>.</sup>   | --- <sup>.</sup>  | --- <sup>.</sup>  |
| <i>Festuca ovina</i>                                               | 53.3 <sup>89</sup> | --- <sup>32</sup>  | --- <sup>33</sup> | --- <sup>18</sup> |
| <i>Danthonia decumbens</i>                                         | 52.2 <sup>33</sup> | --- <sup>.</sup>   | --- <sup>.</sup>  | --- <sup>.</sup>  |
| <i>Galium verum</i>                                                | 51.1 <sup>89</sup> | 20.0 <sup>62</sup> | --- <sup>25</sup> | --- <sup>4</sup>  |
| <i>Centaurea scabiosa</i>                                          | 47.3 <sup>28</sup> | --- <sup>.</sup>   | --- <sup>.</sup>  | --- <sup>.</sup>  |
| <i>Rumex acetosella</i>                                            | 47.3 <sup>28</sup> | --- <sup>.</sup>   | --- <sup>.</sup>  | --- <sup>.</sup>  |
| <i>Centaurea stoebe</i>                                            | 47.3 <sup>28</sup> | --- <sup>.</sup>   | --- <sup>.</sup>  | --- <sup>.</sup>  |
| <i>Phleum phleoides</i>                                            | 47.3 <sup>28</sup> | --- <sup>.</sup>   | --- <sup>.</sup>  | --- <sup>.</sup>  |
| <i>Campanula rotundifolia</i>                                      | 44.8 <sup>72</sup> | --- <sup>35</sup>  | --- <sup>33</sup> | --- <sup>.</sup>  |
| <i>Calamagrostis epigeios</i>                                      | 44.0 <sup>61</sup> | --- <sup>11</sup>  | 7.9 <sup>33</sup> | --- <sup>4</sup>  |
| <i>Koeleria macrantha</i>                                          | 42.0 <sup>22</sup> | --- <sup>.</sup>   | --- <sup>.</sup>  | --- <sup>.</sup>  |
| <i>Pyrus pyraister</i>                                             | 38.8 <sup>33</sup> | 3.2 <sup>14</sup>  | --- <sup>.</sup>  | --- <sup>.</sup>  |
| <i>Dianthus carthusianorum</i>                                     | 38.2 <sup>22</sup> | --- <sup>3</sup>   | --- <sup>.</sup>  | --- <sup>.</sup>  |
| <i>Euphorbia cyparissias</i>                                       | 37.7 <sup>61</sup> | 18.8 <sup>46</sup> | --- <sup>17</sup> | --- <sup>.</sup>  |
| <i>Filipendula vulgaris</i>                                        | 36.1 <sup>17</sup> | --- <sup>.</sup>   | --- <sup>.</sup>  | --- <sup>.</sup>  |
| <i>Hieracium murorum</i>                                           | 35.8 <sup>44</sup> | --- <sup>.</sup>   | --- <sup>17</sup> | --- <sup>18</sup> |
| <i>Prunus avium</i>                                                | 32.2 <sup>78</sup> | --- <sup>14</sup>  | 9.7 <sup>58</sup> | --- <sup>50</sup> |
| <b>Comm. <i>Galium verum</i> – <i>Quercus petraea</i></b>          |                    |                    |                   |                   |
| <i>Convallaria majalis</i>                                         | --- <sup>6</sup>   | 64.9 <sup>84</sup> | --- <sup>8</sup>  | --- <sup>29</sup> |
| <i>Polygonatum odoratum</i>                                        | --- <sup>.</sup>   | 63.8 <sup>65</sup> | --- <sup>17</sup> | --- <sup>.</sup>  |
| <i>Lathyrus niger</i>                                              | --- <sup>.</sup>   | 55.9 <sup>54</sup> | --- <sup>8</sup>  | --- <sup>7</sup>  |
| <i>Campanula persicifolia</i>                                      | --- <sup>11</sup>  | 54.2 <sup>51</sup> | --- <sup>.</sup>  | --- <sup>4</sup>  |
| <i>Melica nutans</i>                                               | --- <sup>17</sup>  | 52.9 <sup>59</sup> | --- <sup>.</sup>  | --- <sup>11</sup> |
| <i>Lilium martagon</i>                                             | --- <sup>.</sup>   | 49.1 <sup>30</sup> | --- <sup>.</sup>  | --- <sup>.</sup>  |
| <i>Lathyrus vernus</i>                                             | --- <sup>.</sup>   | 48.1 <sup>46</sup> | 1.6 <sup>17</sup> | --- <sup>.</sup>  |
| <i>Sedum maximum</i>                                               | 10.5 <sup>28</sup> | 48.1 <sup>54</sup> | --- <sup>.</sup>  | --- <sup>.</sup>  |
| <i>Vincetoxicum hirundinaria</i>                                   | --- <sup>6</sup>   | 47.7 <sup>35</sup> | --- <sup>.</sup>  | --- <sup>.</sup>  |
| <i>Fallopia dumetorum</i>                                          | 1.5 <sup>22</sup>  | 46.5 <sup>54</sup> | --- <sup>8</sup>  | --- <sup>.</sup>  |
| <i>Anthericum ramosum</i>                                          | --- <sup>.</sup>   | 41.4 <sup>22</sup> | --- <sup>.</sup>  | --- <sup>.</sup>  |
| <i>Linaria vulgaris</i>                                            | --- <sup>.</sup>   | 41.4 <sup>22</sup> | --- <sup>.</sup>  | --- <sup>.</sup>  |
| <i>Rhamnus catharticus</i>                                         | --- <sup>.</sup>   | 41.4 <sup>22</sup> | --- <sup>.</sup>  | --- <sup>.</sup>  |
| <i>Dryopteris filix-mas</i>                                        | --- <sup>11</sup>  | 38.8 <sup>51</sup> | --- <sup>8</sup>  | --- <sup>21</sup> |
| <i>Agropyron repens</i>                                            | --- <sup>17</sup>  | 38.4 <sup>41</sup> | --- <sup>.</sup>  | --- <sup>7</sup>  |
| <i>Galium boreale</i>                                              | --- <sup>6</sup>   | 37.0 <sup>24</sup> | --- <sup>.</sup>  | --- <sup>.</sup>  |

|                             |                    |                    |                   |                   |
|-----------------------------|--------------------|--------------------|-------------------|-------------------|
| <i>Euonymus europaea</i>    | ---                | 35.6 <sup>16</sup> | ---               | ---               |
| <i>Mercurialis perennis</i> | ---                | 35.6 <sup>16</sup> | ---               | ---               |
| <i>Poa nemoralis</i>        | --- <sup>39</sup>  | 35.1 <sup>92</sup> | --- <sup>58</sup> | --- <sup>61</sup> |
| <i>Genista tinctoria</i>    | 13.0 <sup>22</sup> | 34.3 <sup>35</sup> | ---               | ---               |
| <i>Galeopsis ladanum</i>    | ---                | 32.4 <sup>14</sup> | ---               | ---               |
| <i>Serratula tinctoria</i>  | ---                | 32.4 <sup>14</sup> | ---               | ---               |
| <i>Urtica dioica</i>        | ---                | 31.8 <sup>24</sup> | ---               | 4.0 <sup>11</sup> |
| <i>Galium schultesii</i>    | ---                | 30.0 <sup>16</sup> | ---               | --- <sup>4</sup>  |

**Comm. *Molinia caerulea* – *Pinus sylvestris***

|                                 |                    |                   |                     |                   |    |
|---------------------------------|--------------------|-------------------|---------------------|-------------------|----|
| <i>Larix decidua</i>            | --- <sup>17</sup>  | ---               | 53.5 <sup>67</sup>  | ---               | 7  |
| <i>Rubus hirtus</i> agg.        | ---                | ---               | 44.6 <sup>50</sup>  | 8.1 <sup>25</sup> |    |
| <i>Pseudoscleropodium purum</i> | --- <sup>6</sup>   | ---               | 37.7 <sup>25</sup>  | ---               |    |
| <i>Dryopteris carthusiana</i>   | ---                | 9.5 <sup>51</sup> | 37.1 <sup>75</sup>  | 3.8 <sup>46</sup> |    |
| <i>Vicia cassubica</i>          | ---                | ---               | 36.1 <sup>17</sup>  | ---               |    |
| <i>Pinus sylvestris</i>         | 27.6 <sup>94</sup> | --- <sup>70</sup> | 34.8 <sup>100</sup> | ---               | 29 |
| <i>Betula pendula</i>           | 3.0 <sup>28</sup>  | ---               | 32.5 <sup>50</sup>  | ---               | 11 |
| <i>Senecio ovatus</i>           | --- <sup>6</sup>   | ---               | 31.5 <sup>25</sup>  | ---               | 4  |
| <i>Deschampsia flexuosa</i>     | --- <sup>67</sup>  | ---               | 30.9 <sup>100</sup> | 6.1 <sup>82</sup> |    |

**Ass. *Tilio cordatae*-*Carpinetum betuli***

|                               |                   |                    |                    |                    |  |
|-------------------------------|-------------------|--------------------|--------------------|--------------------|--|
| <i>Festuca altissima</i>      | ---               | ---                | ---                | 44.7 <sup>50</sup> |  |
| <i>Atrichum undulatum</i>     | ---               | ---                | ---                | 41.1 <sup>25</sup> |  |
| <i>Luzula luzuloides</i>      | --- <sup>17</sup> | 10.4 <sup>73</sup> | 12.8 <sup>75</sup> | 34.3 <sup>93</sup> |  |
| <i>Dicranella heteromalla</i> | ---               | ---                | ---                | 33.8 <sup>29</sup> |  |
| <i>Maianthemum bifolium</i>   | ---               | ---                | 22.7 <sup>33</sup> | 31.6 <sup>39</sup> |  |
| <i>Tilia cordata</i>          | ---               | ---                | ---                | 31.6 <sup>29</sup> |  |

**Other species**

|                                  |                    |                    |                     |                    |     |
|----------------------------------|--------------------|--------------------|---------------------|--------------------|-----|
| <i>Fagus sylvatica</i>           | --- <sup>17</sup>  | ---                | 12.8 <sup>42</sup>  | 27.6 <sup>54</sup> |     |
| <i>Polytrichastrum formosum</i>  | --- <sup>22</sup>  | ---                | 4.5 <sup>33</sup>   | 25.5 <sup>50</sup> |     |
| <i>Frangula alnus</i>            | --- <sup>33</sup>  | ---                | 25.5 <sup>58</sup>  | 19.8 <sup>54</sup> |     |
| <i>Vaccinium myrtillus</i>       | --- <sup>50</sup>  | ---                | 28.6 <sup>100</sup> | 18.2 <sup>93</sup> |     |
| <i>Melampyrum pratense</i>       | --- <sup>22</sup>  | ---                | 11.6 <sup>42</sup>  | 17.4 <sup>46</sup> |     |
| <i>Impatiens parviflora</i>      | --- <sup>6</sup>   | 13.0 <sup>35</sup> | ---                 | 13.8 <sup>36</sup> |     |
| <i>Corylus avellana</i>          | 18.3 <sup>44</sup> | ---                | 4.3 <sup>33</sup>   | 11.8 <sup>39</sup> |     |
| <i>Calamagrostis arundinacea</i> | --- <sup>33</sup>  | 28.2 <sup>89</sup> | ---                 | 10.9 <sup>75</sup> |     |
| <i>Milium effusum</i>            | --- <sup>6</sup>   | ---                | 12.2 <sup>17</sup>  | ---                | 11  |
| <i>Brachypodium sylvaticum</i>   | 13.7 <sup>22</sup> | ---                | 4.5 <sup>17</sup>   | ---                | 14  |
| <i>Quercus petraea</i>           | --- <sup>100</sup> | ---                | ---                 | ---                | 100 |
| <i>Hypnum cupressiforme</i>      | --- <sup>39</sup>  | ---                | 11.9 <sup>58</sup>  | ---                | 46  |
| <i>Sorbus aucuparia</i>          | --- <sup>83</sup>  | ---                | 21.1 <sup>100</sup> | ---                | 86  |
| <i>Moehringia trinervia</i>      | --- <sup>28</sup>  | 15.5 <sup>57</sup> | 7.6 <sup>50</sup>   | ---                | 39  |
| <i>Stellaria media</i>           | --- <sup>11</sup>  | 26.5 <sup>46</sup> | ---                 | ---                | 21  |
| <i>Galium rotundifolium</i>      | 19.4 <sup>50</sup> | ---                | ---                 | ---                | 29  |
| <i>Viola reichenbachiana</i>     | 1.4 <sup>17</sup>  | ---                | 14.6 <sup>25</sup>  | ---                | 11  |
| <i>Lactuca muralis</i>           | --- <sup>22</sup>  | ---                | 27.7 <sup>58</sup>  | ---                | 29  |
| <i>Rubus fruticosus</i> agg.     | 17.9 <sup>83</sup> | ---                | 17.9 <sup>83</sup>  | ---                | 61  |
| <i>Rubus idaeus</i>              | --- <sup>17</sup>  | 29.3 <sup>65</sup> | 11.8 <sup>50</sup>  | ---                | 29  |
| <i>Rosa canina</i>               | 25.9 <sup>56</sup> | 1.0 <sup>35</sup>  | ---                 | ---                | 21  |
| <i>Geranium robertianum</i>      | --- <sup>6</sup>   | 26.5 <sup>30</sup> | 4.7 <sup>17</sup>   | ---                | 4   |
| <i>Veronica officinalis</i>      | --- <sup>17</sup>  | ---                | 21.1 <sup>33</sup>  | ---                | 7   |

|                              |                    |                    |                   |                   |
|------------------------------|--------------------|--------------------|-------------------|-------------------|
| <i>Viola riviniana</i>       | 11.3 <sup>50</sup> | 9.7 <sup>49</sup>  | 1.4 <sup>42</sup> | --- <sup>21</sup> |
| <i>Potentilla alba</i>       | 3.1 <sup>22</sup>  | 25.6 <sup>38</sup> | --- <sup>17</sup> | --- <sup>4</sup>  |
| <i>Brachypodium pinnatum</i> | 12.2 <sup>33</sup> | 14.6 <sup>35</sup> | 1.0 <sup>25</sup> | --- <sup>4</sup>  |
| <i>Hypericum perforatum</i>  | 30.0 <sup>56</sup> | --- <sup>30</sup>  | 2.4 <sup>33</sup> | --- <sup>7</sup>  |
| <i>Silene vulgaris</i>       | 24.8 <sup>61</sup> | 26.1 <sup>62</sup> | --- <sup>33</sup> | --- <sup>4</sup>  |

---
